# Supplementary material
Source: PubMed Central journal article supplement (PMC6879771)
Supplement: Supplemental_Material3.pdf [file Supplemental_Material3.pdf]

## Figure Legends

**Figure 1.** Nissl and TTC staining following H<sub>2</sub> inhalation in rats with HIBD.

**a:** Representative images of Nissl staining in the left frontal and parietal cortex and hippocampal CA1 region of the HIBD, 90-min H<sub>2</sub>, and 90-min H<sub>2</sub> at 2 h after HI groups at 72 h after surgery. Scale bar = 100µm. n = 4 per group. **b:** Representative images of TTC staining on the first day after surgery from coronal brain sections of the HIBD, 90-min H<sub>2</sub>, and 90-min H<sub>2</sub> at 2 h after HI groups at 24 h after surgery. **c:** The percentage of the cerebral infarct volume in the ipsilateral hemisphere of different groups. n = 4 per group. \*\*  $P < 0.001$  vs. HIBD group, ††  $P < 0.001$ .

**Figure 2.** H<sub>2</sub> inhalation reduces neuronal apoptosis in the cortex and hippocampal CA1 of rats with HIBD. **a:** Representative TUNEL staining in the left frontal and parietal cortex and hippocampal CA1 region of rats from the HIBD, 90-min H<sub>2</sub> groups and 90-min H<sub>2</sub> at 2 h after HI groups at 72 h after surgery (green, TUNEL positive cells; blue, cell nuclei). Scale bar = 50µm. **b:** The percentage of TUNEL positive staining in each group. n = 4 per group. \*\*  $P < 0.01$  vs. HIBD group, ††  $P < 0.01$ , †  $P < 0.05$ .
