# Supplementary material
Source: PubMed Central journal article supplement (PMC6879771)

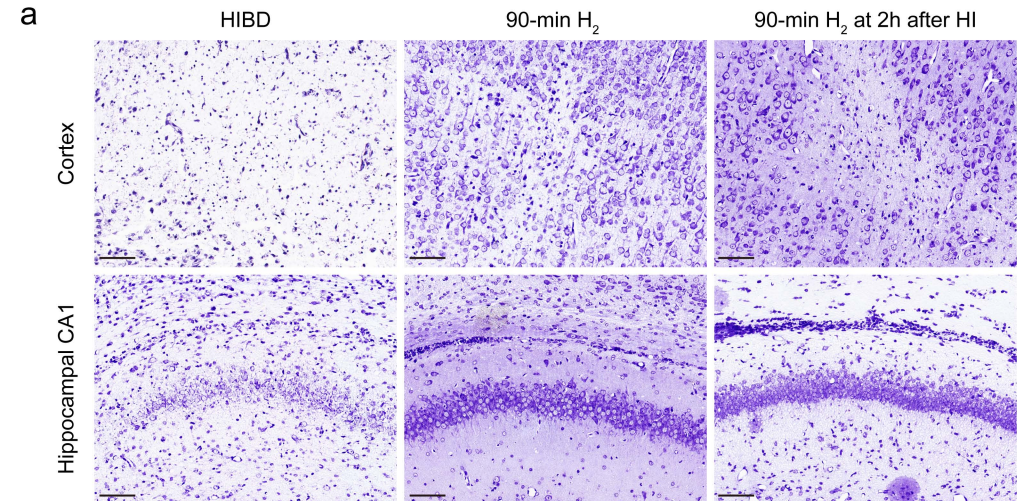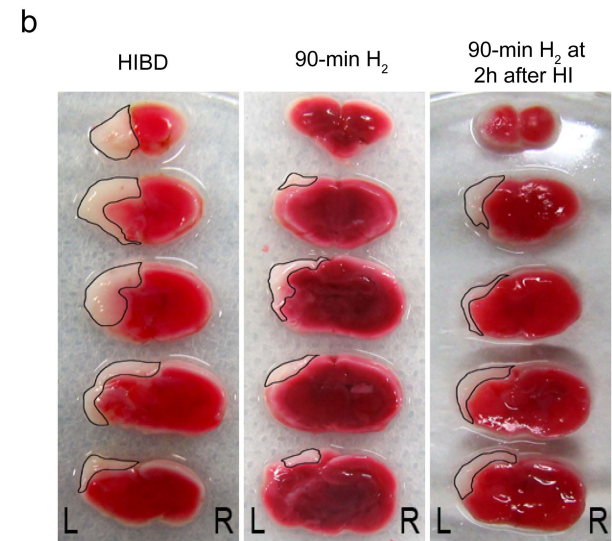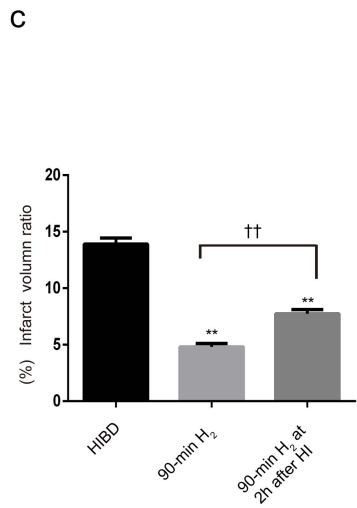

Supplement: Supplemental_Material1.pdf [file Supplemental_Material1.pdf]

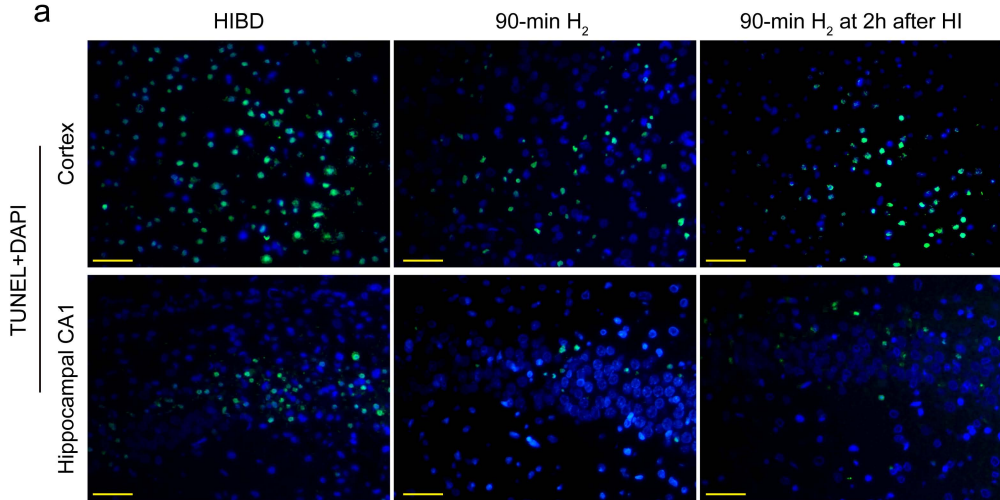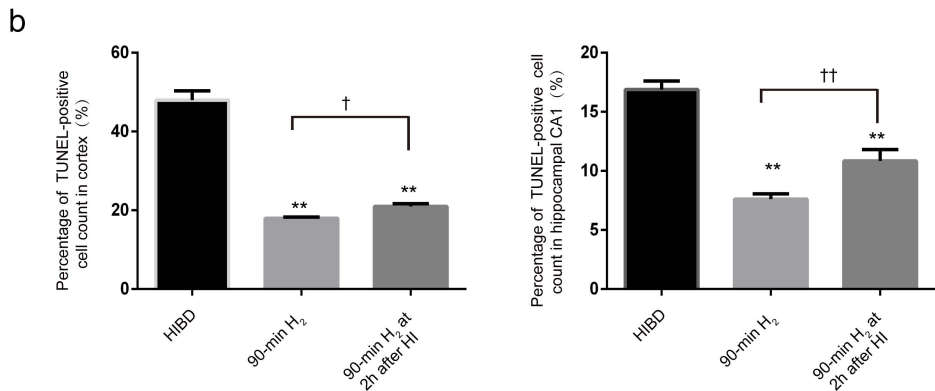

Supplement: Supplemental_Material2.pdf [file Supplemental_Material2.pdf]
